# Supplementary material for: Electro Fenton's reaction coupled Zn-air battery for in situ pollutant degradation
Source: Royal Society of Chemistry journal article supplement (doi:10.1039/d3gc03155a), 2023-01-01
Supplement: d3gc03155a1.pdf [file d3gc03155a1.pdf]

## Supplementary Information

### Electro Fenton's Reaction Coupled Zn-Air Battery for In-Situ Pollutant Degradation

*Neethu Christudas Dargily<sup>a†</sup>, Giddaerappa Kuntoji<sup>a†</sup>, Rahul Mahadeo Mendhe<sup>a†</sup>, Akshay Haridas<sup>a</sup>, Ravikumar Thimmappa<sup>a</sup>, Surbhi Sharma<sup>b</sup>, Musthafa Ottakam Thotiyl<sup>a\*</sup>*

*<sup>a</sup>Department of Chemistry and Centre for Energy Science, Indian Institute of Science Education and Research (IISER)-Pune, Dr. Homi Bhabha Road, Pashan, Pune 411008, Maharashtra, India*

*<sup>b</sup>Centre for New Energy Transition Research (CfNETR), Federation University Australia, Gippsland Campus, 1 Northways Road, Churchill 3842, Australia*

*\*Corresponding author*

*† These authors contributed equally*

## Table of contents

| Figures no         | Descriptions                                                                                                                                                                                | Page no |
|--------------------|---------------------------------------------------------------------------------------------------------------------------------------------------------------------------------------------|---------|
| <b>Schemes</b>     |                                                                                                                                                                                             |         |
| Scheme S1          | Schematic representation of the battery architectural components.                                                                                                                           | 4       |
| Scheme S2          | Reaction scheme for the electrochemical reduction of ethylanthraquinone and its chemical oxidation in presence of O <sub>2</sub> to generate H <sub>2</sub> O <sub>2</sub> .                | 6       |
| Scheme S3          | Schematic representation showing the hydroxyl radical assisted degradation pathways of paracetamol.                                                                                         | 11      |
| Scheme S4          | Schematic representation showing the hydroxyl radical assisted degradation pathways of phenol.                                                                                              | 13      |
| <b>Calculation</b> |                                                                                                                                                                                             |         |
| Calculation S1     | Finding the number of electrons using Levich equation at various potentials.                                                                                                                | 8       |
| <b>Figures</b>     |                                                                                                                                                                                             |         |
| Figure S1          | FTIR spectra of AQ and AQ/C composite materials.                                                                                                                                            | 4       |
| Figure S2          | FESEM images of the AQ/C composite at different magnification.                                                                                                                              | 5       |
| Figure S3          | HRTEM images AQ/C composite at (a,b) different magnification.                                                                                                                               | 6       |
| Figure S4          | Cyclic voltammograms of AQ/C electrode at different scan rates in 0.5 M H <sub>2</sub> SO <sub>4</sub> solution in (a) N <sub>2</sub> saturated solution and (b) oxygen saturated solution. | 7       |
| Figure S5          | Levich plot extracted from Figure 1e.                                                                                                                                                       | 7       |
| Figure S6          | Calibration plot extracted from Figure 2d.                                                                                                                                                  | 9       |

|                   |                                                                                                                                                                                                                                                                                                                                               |    |
|-------------------|-----------------------------------------------------------------------------------------------------------------------------------------------------------------------------------------------------------------------------------------------------------------------------------------------------------------------------------------------|----|
| Figure S7         | (a) XRD and (b) FTIR spectra of AQ/C composite electrode before and after battery discharge.                                                                                                                                                                                                                                                  | 9  |
| Figure S8         | (a) pH of anodic and cathodic compartment under open circuit condition for a period of 24 hours.<br>(b) OCV at t = 0 and t = 24 hr                                                                                                                                                                                                            | 10 |
| Figure S9         | Polarization curves of the Zn-air battery at varying conditions. (with and without Fe <sup>2+</sup> /Paracetamol / purging with N <sub>2</sub> or O <sub>2</sub> .)                                                                                                                                                                           | 10 |
| Figure S10        | (a) Time dependent UV-Vis spectra of the battery catholyte in absence of Fe <sup>2+</sup> ions. (b) NMR spectra of the catholyte before and after the battery discharge in absence of Fe <sup>2+</sup> ions.                                                                                                                                  | 11 |
| Figure S11        | (a) XRD and (b) FTIR spectra of AQ/C composite electrode before and after battery discharge.                                                                                                                                                                                                                                                  | 12 |
| Figure S12        | The performance of the pollutant degrading air battery for multiple cycles in O <sub>2</sub> purged H <sub>2</sub> SO <sub>4</sub> solution (pH 3) containing 0.2 mM Fe <sup>2+</sup> and paracetamol (0.5 mM). (a) Polarization curves of the Zn-air battery and (b) the corresponding galvanostatic polarization at 10 mA/cm <sup>2</sup> . | 12 |
| Figure S13        | (a) XRD and (b) FTIR spectra of AQ/C composite electrode before and after battery discharge.                                                                                                                                                                                                                                                  | 13 |
| Figure S14        | UV-Vis spectra of the electrolyte before and after discharge at 5 mA/cm <sup>2</sup> .                                                                                                                                                                                                                                                        | 14 |
| Figure S15        | Degradation efficiency (%) demonstrated by various methods in comparison to this work.                                                                                                                                                                                                                                                        | 14 |
| <b>References</b> |                                                                                                                                                                                                                                                                                                                                               | 15 |

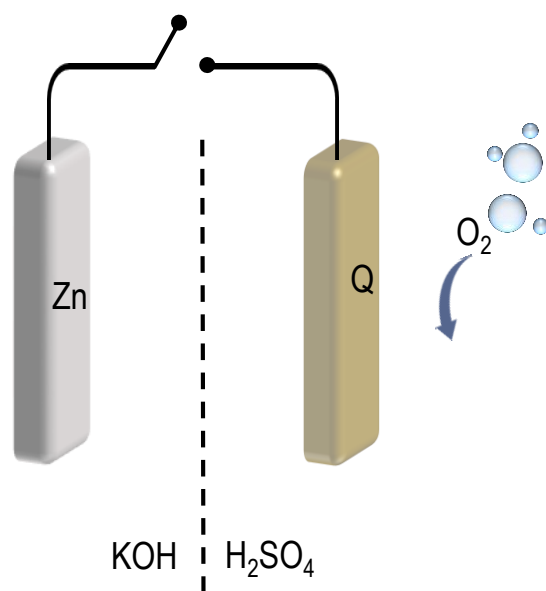

**Scheme S1.** Schematic representation of the battery architectural components.

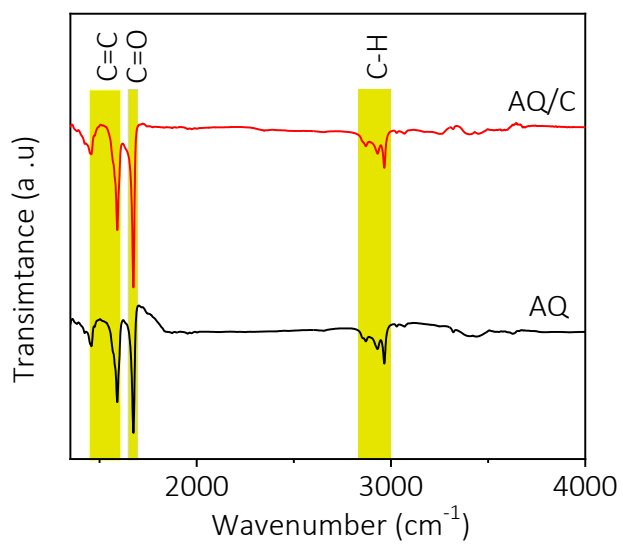

**Figure S1.** FTIR spectra of AQ and AQ/C composite materials.

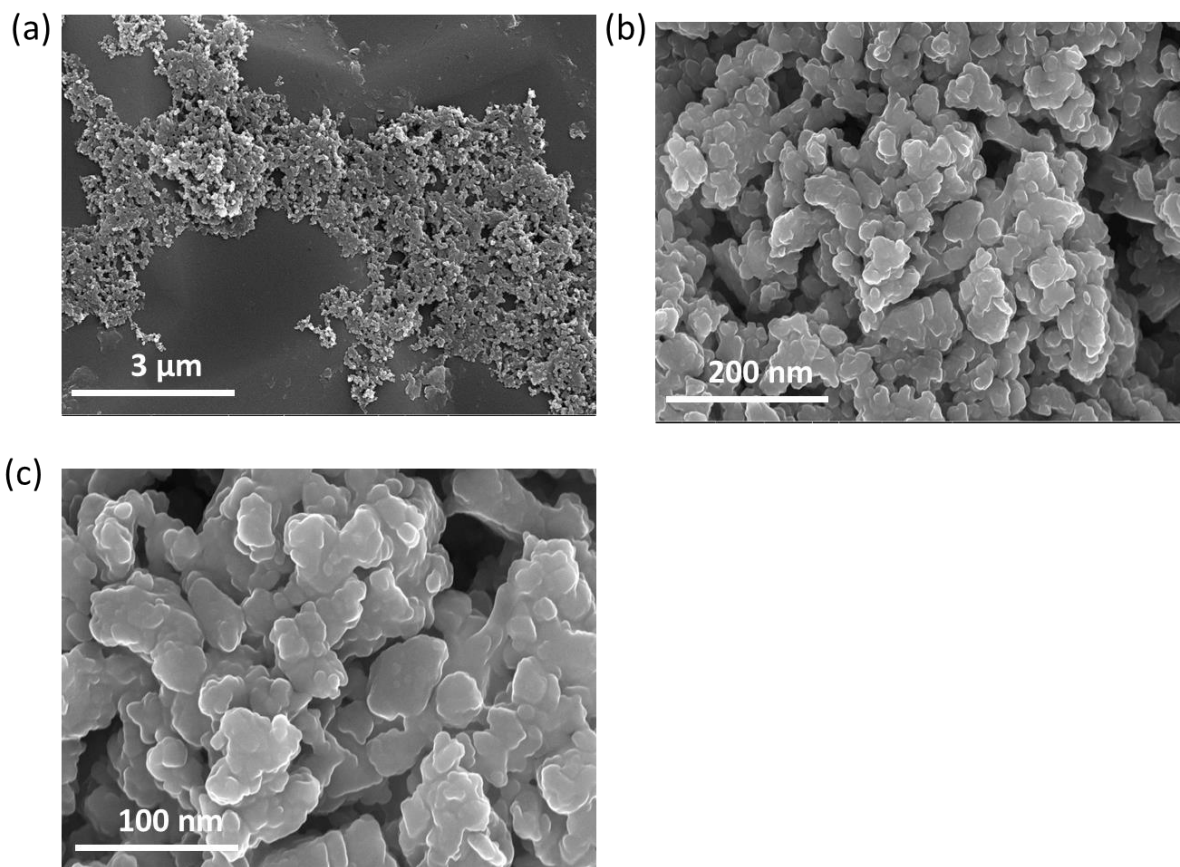

**Figure S2.** FESEM images of the AQ/C composite at different magnifications.

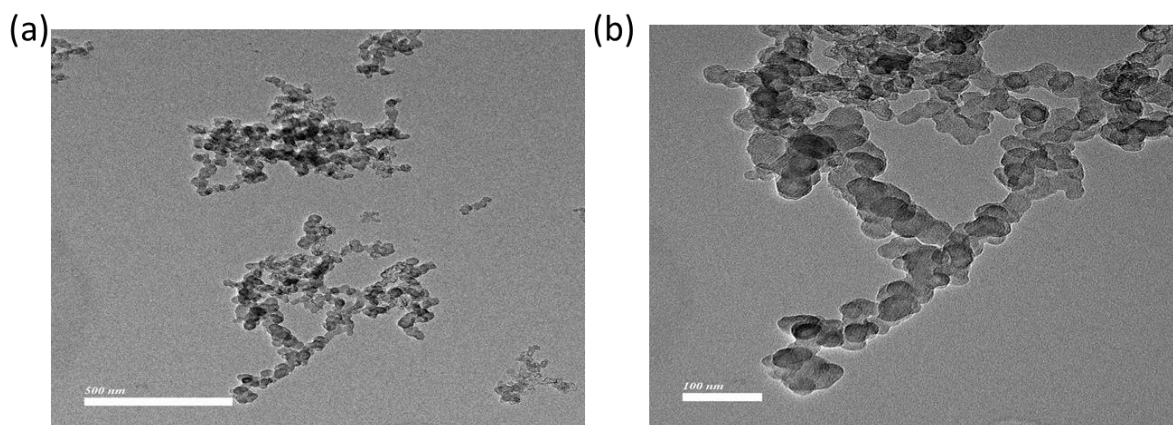

**Figure S3.** HRTEM images AQ/C composites at (a, b) different magnifications.

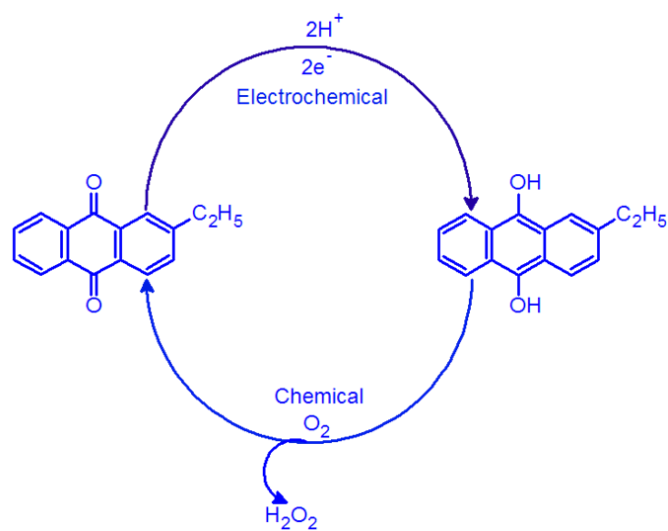

**Scheme S2.** Reaction scheme for the electrochemical reduction of ethylanthraquinone and its chemical oxidation in presence of  $\text{O}_2$  to generate  $\text{H}_2\text{O}_2$ . [Ref: 1, 2]

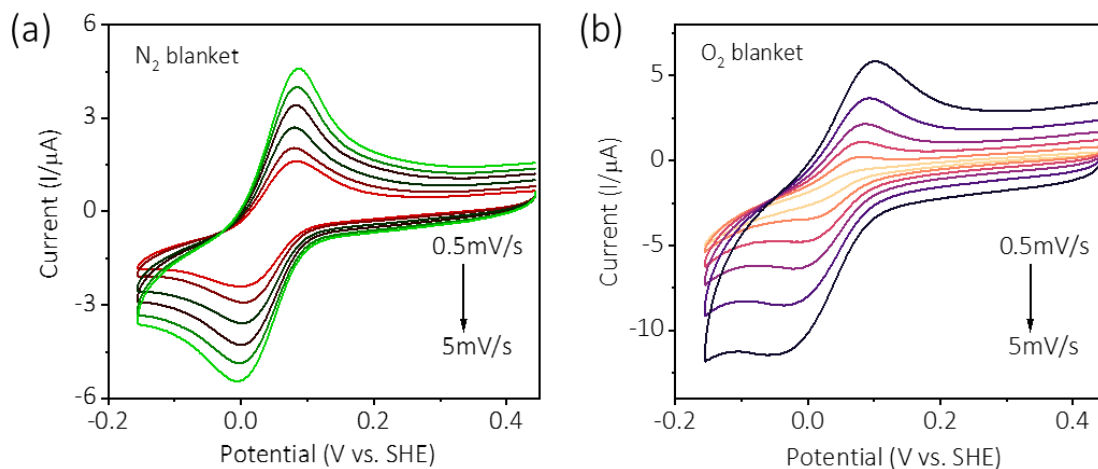

**Figure S4.** Cyclic voltammograms of AQ/C electrode at different scan rates in 0.5 M H<sub>2</sub>SO<sub>4</sub> solution in (a) N<sub>2</sub>saturated solution and (b) oxygen saturated solution.

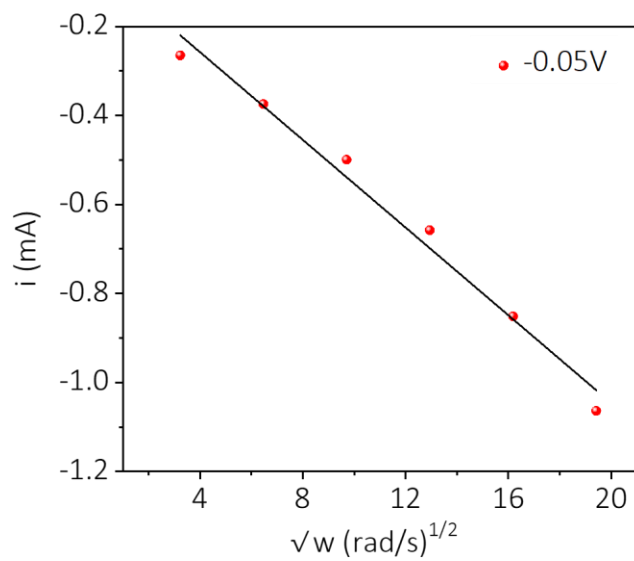

**Figure S5.** Levich plot extracted from Figure 1e.

## Calculation S1.

Finding the number of electrons using Levich equation

$$1/\text{slope} = 0.62 n F A D^{(2/3)} u^{(-1/6)} C$$

where,

$$F = 96485.33 \text{ C/mol}$$

$$A = 0.196 \text{ cm}^2$$

$$D = 1.93 \times 10^{-5} \text{ cm}^2/\text{s}$$

$$\text{Kinematic viscosity } (u) = 0.0100$$

$$C = 1.26 \times 10^{-6} \text{ M/cm}^2$$

The Slope values were extracted from the Levich plot at 1600 RPM

$$\text{at } -0.05 \text{ V} = 4.9298 \text{ e}^{-5},$$

$$\text{at } -0.1 \text{ V} = 5.1148 \text{ e}^{-5},$$

$$\text{at } -0.15 \text{ V} = 5.5341 \text{ e}^{-5} \text{ and}$$

$$\text{at } -0.2 \text{ V} = 6.0313 \text{ e}^{-5}$$

| Potential E(V) vs. SHE | No. of electrons from RRDE |
|------------------------|----------------------------|
| -0.05 V                | 2.15                       |
| -0.1 V                 | 2.23                       |
| -0.15 V                | 2.41                       |
| -0.2 V                 | 2.63                       |



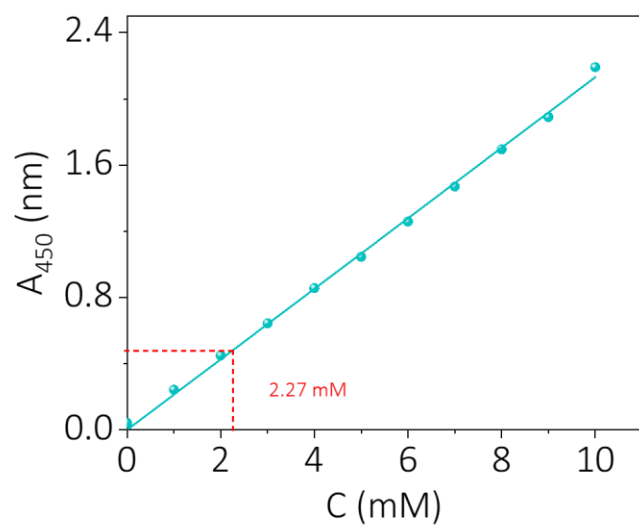

**Figure S6.** Calibration plot extracted from Figure 2d.

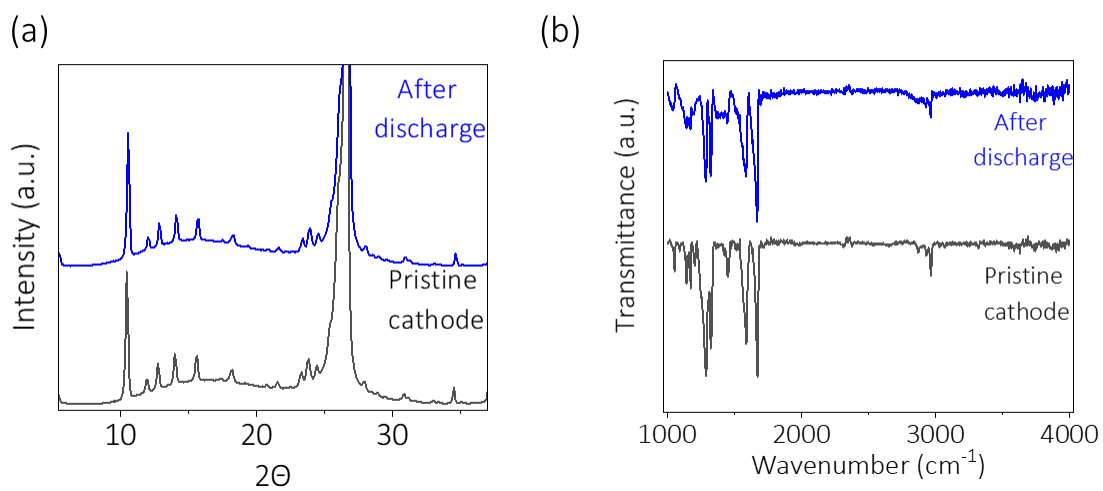

**Figure S7.** (a) XRD and (b) FTIR spectra of AQ/C composite electrode before and after battery discharge.

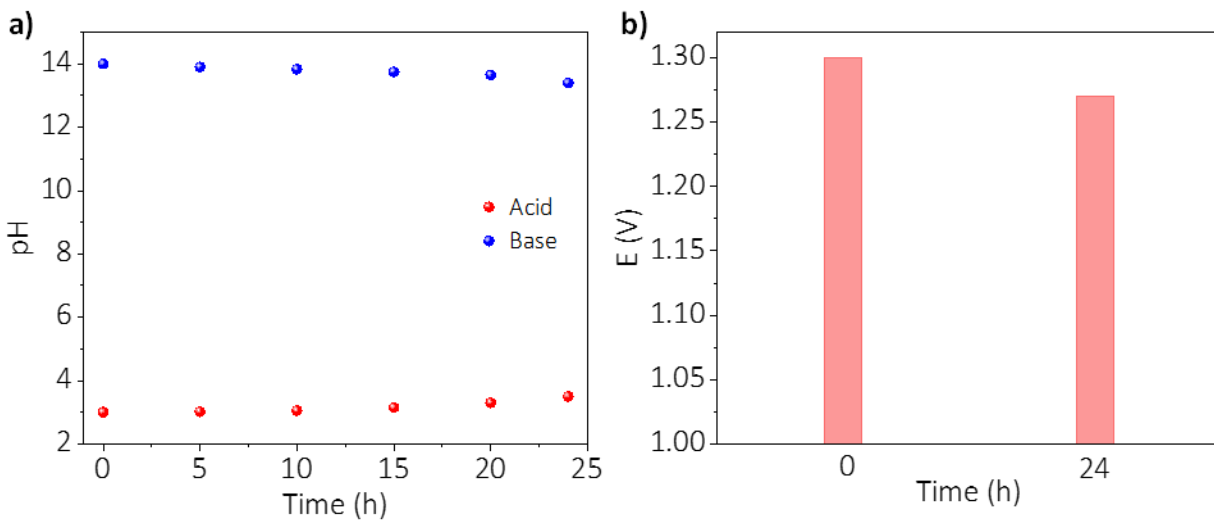

**Figure S8.** (a) pH of anodic and cathodic half-cells under open circuit condition (OCV) for a period of 24 hours. (b) OCV at t = 0 hr and t = 24 hr.

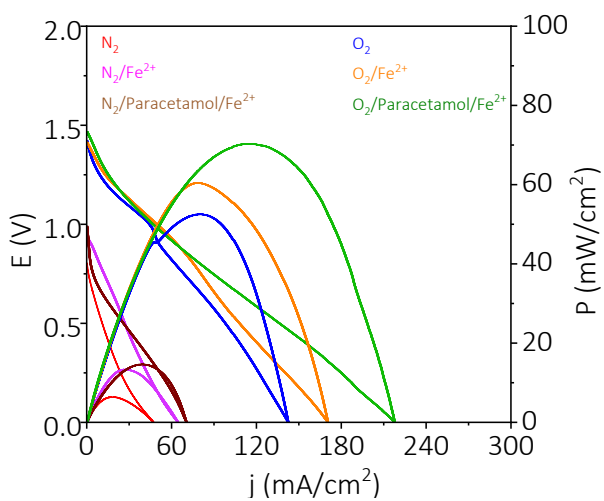

**Figure S9.** Polarization curves of the Zn-air battery at varying conditions (with and without  $Fe^{2+}$ /paracetamol / purging with  $N_2$  or  $O_2$ ).

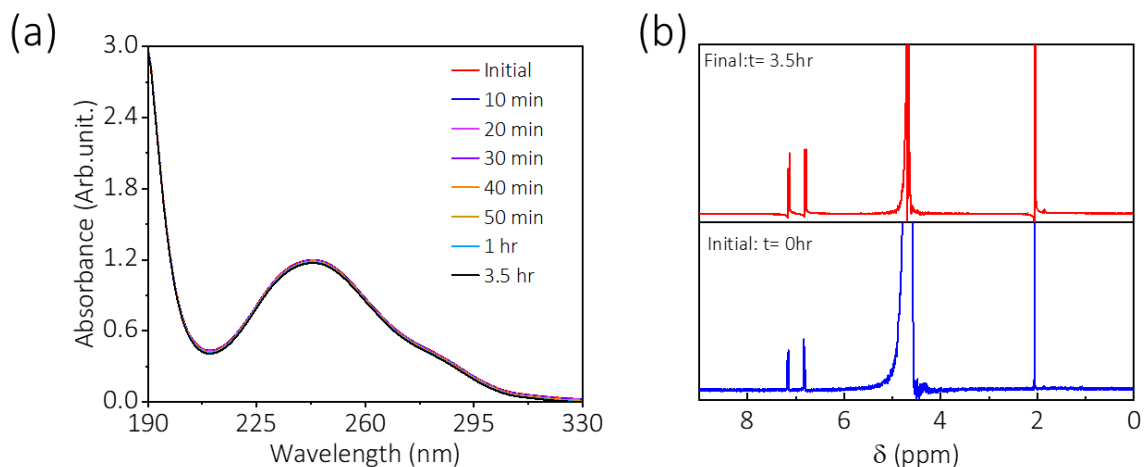

**Figure S10.** (a) Time dependent UV-Vis spectra of the battery catholyte in absence of  $\text{Fe}^{2+}$  ions. (b) NMR spectra of the catholyte before and after the battery discharge in absence of  $\text{Fe}^{2+}$  ions.

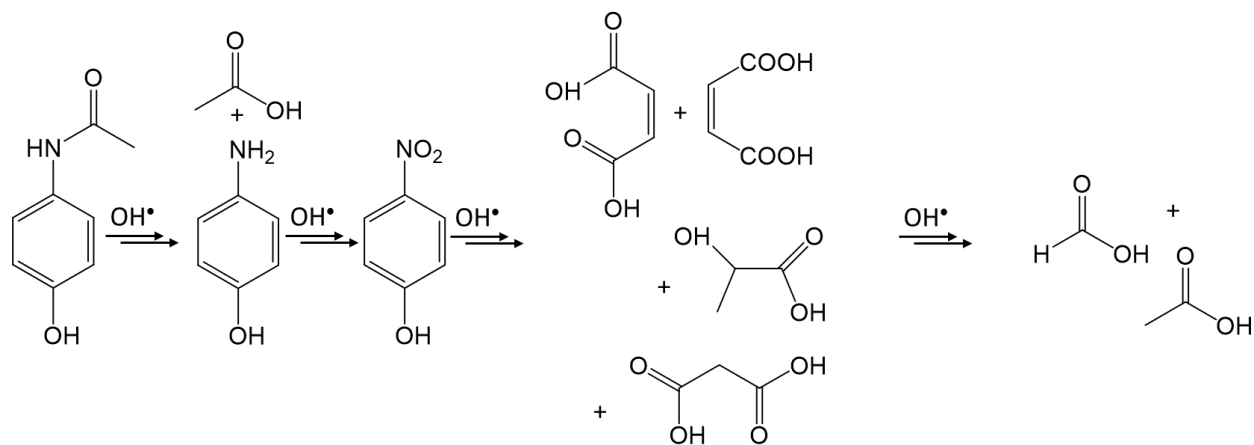

**Scheme S3.** Schematic representation showing the hydroxyl radical assisted degradation pathways of paracetamol forming formic acid and acetic acid. [Ref: 3]

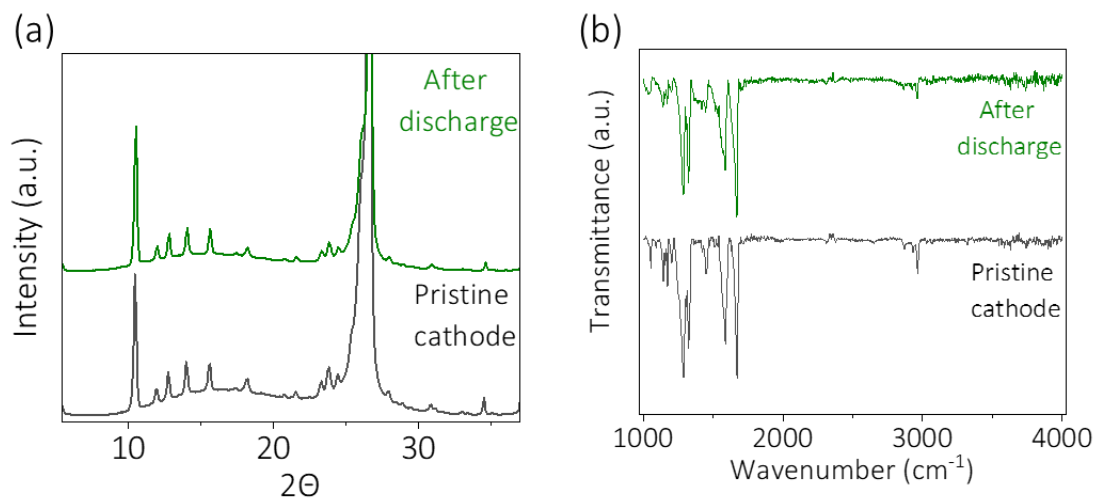

**Figure S11.** (a) XRD and (b) FTIR spectra of AQ/C composite electrode before and after battery discharge.

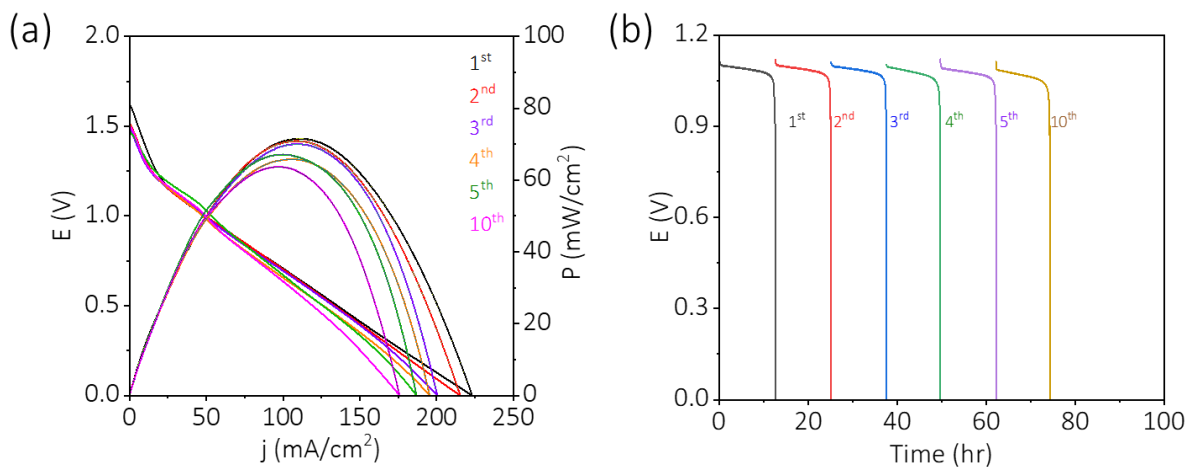

**Figure S12.** The performance of the pollutant degrading air battery for multiple cycles in  $\text{O}_2$ -purged  $\text{H}_2\text{SO}_4$  solution (pH 3) containing  $0.2\text{ mM Fe}^{2+}$  and paracetamol ( $0.5\text{ mM}$ ). (a) Polarization curves of the Zn-air battery and (b) the corresponding galvanostatic polarization at  $10\text{ mA}/\text{cm}^2$ .

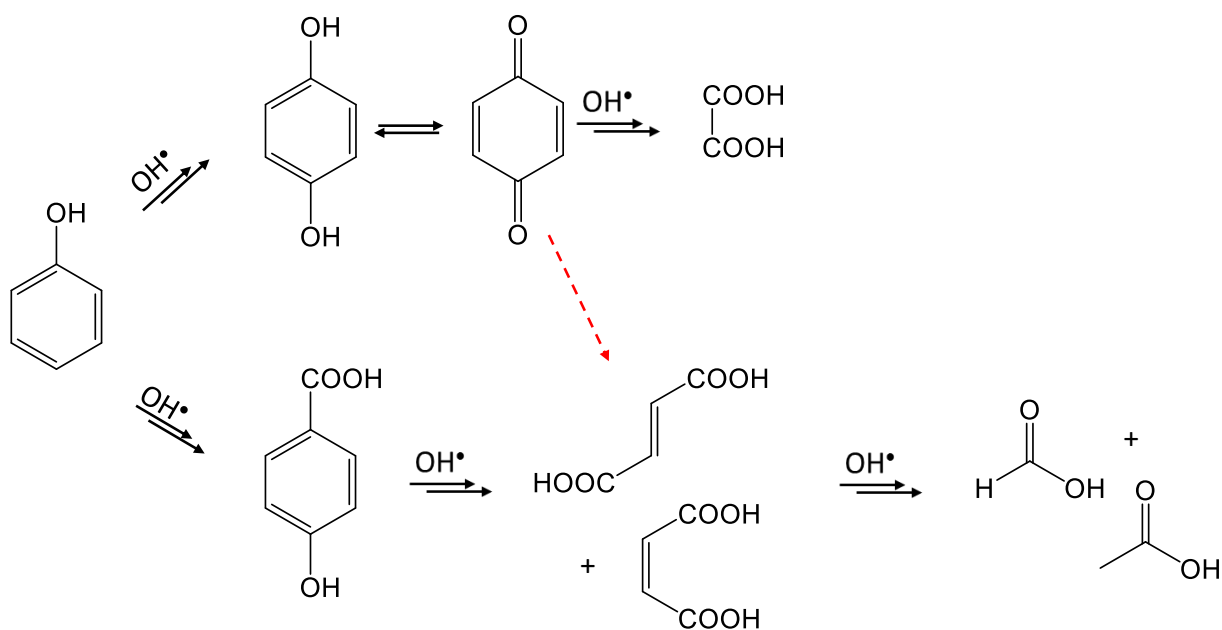

**Scheme S4.** Schematic representation showing the hydroxyl radical assisted degradation pathways of phenol forming formic acid and acetic acid. [Ref: 4]

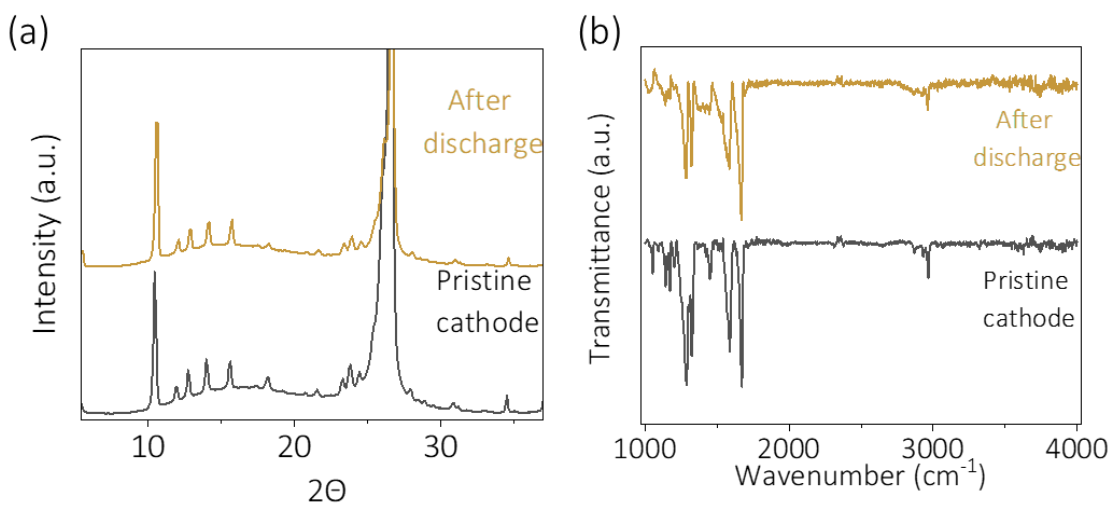

**Figure S13.** (a) XRD and (b) FTIR spectra of AQ/C electrode before and after battery discharge.

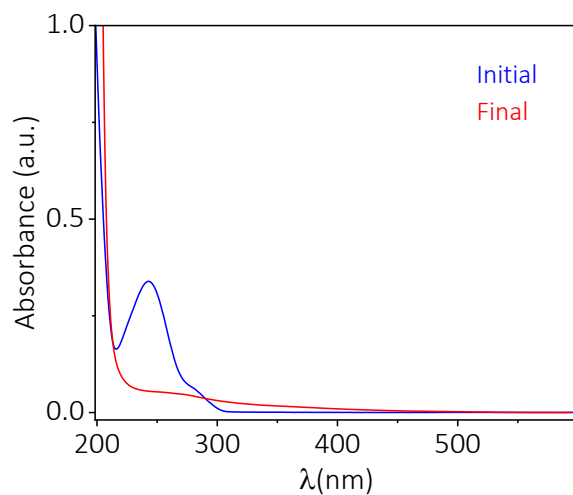

**Figure S14.** UV-Vis spectra of the electrolyte before and after discharge at  $5 \text{ mA cm}^{-2}$ .

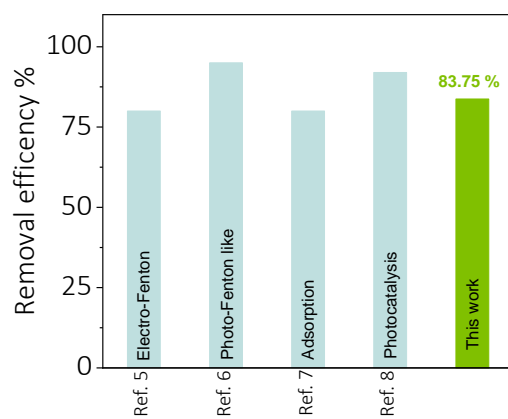

**Figure S15.** Degradation efficiency (%) demonstrated by various methods in comparison to this work.

## References

1. J. M. Campos-Martin, G. Blanco-Brieva and J. L. G. Fierro, *Angew. Chemie Int. Ed.*, 2006, **45**, 6962–6984.
2. H. B. Vibbert, C. Bendel, J. R. Norton and A. J. Moment, *ACS Sustain. Chem. Eng.*, 2022, **10**, 11106–11116.
3. N. Villota, J. M. Lomas and L. M. Camarero, *J. Photochem. Photobiol. A Chem.*, 2016, **329**, 113–119.
4. G. Yang, H. Chen, H. Qin, X. Zhang and Y. Feng, *Can. J. Chem. Eng.*, 2017, **95**, 1518–1525.
5. X. Zheng, M. Gao, C. Liang, S. Wang and X. Wang, *Electrochim. Acta*, 2022, **428**, 140910.
6. A. Abdelhaleem, H. N. Abdelhamid, M. G. Ibrahim and W. Chu, *J. Clean. Prod.*, 2022, **379**, 134571.
7. G. Sivarasan, V. Manikandan, S. Periyasamy, M. S. AlSalhi, S. Devanesan, P. S. Murphin Kumar, R. rao Pasupuleti, X. Liu and H.-M. Lo, *Environ. Res.*, 2023, **227**, 115723.
8. M. Chijioke-Okere, A. H. Abdullah, Z. A. Mohd Hir, J. I. Alinnor and E. E. Oguzie, *Inorg. Chem. Commun.*, 2023, **148**, 110377.
